# Supplementary material for: Anti-neoplastic properties of hydralazine in prostate cancer
Source: PubMed Central journal article supplement (PMC4171604; doi:10.18632/oncotarget.1909), 2014-04-17
Supplement: oncotarget-05-5950-s001.pdf [file oncotarget-05-5950-s001.pdf]

## Anti-neoplastic properties of hydralazine in prostate cancer

### Supplementary Material

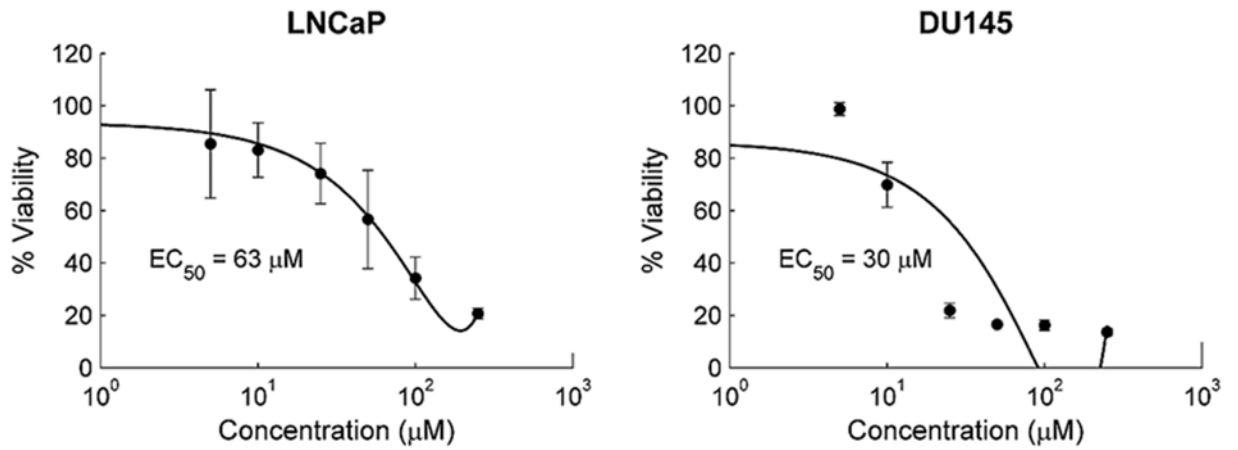

**Supplementary Figure 1:** Graphic representation of hydralazine half-maximal effective concentration (EC<sub>50</sub>) in LNCaP and DU145 cell lines, at 72h. LNCaP displayed an EC<sub>50</sub> of 63 μM, whereas for DU145 only 30 μM were required.

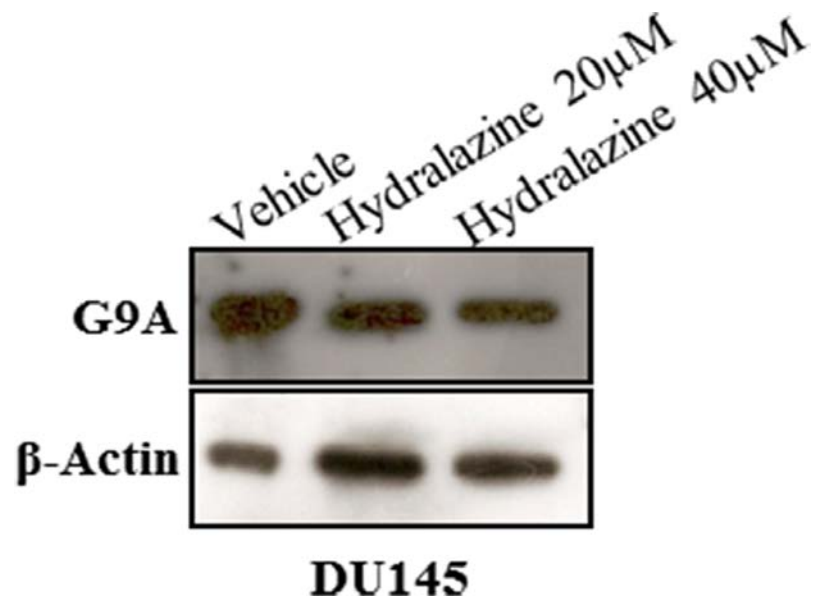

**Supplementary Figure 2:** Effect of hydralazine exposure on histone methyltransferase G9A expression. Western blot analysis of G9A, in DU145 cells, after 3 days of drug exposure.  $\beta$ -Actin was used as loading control.
